# Supplementary material for: Technical emptiability of dairy product packaging and its environmental implications in Austria
Source: PeerJ. 2019 Sep 10;7:e7578. doi: 10.7717/peerj.7578 (PMC6743449; doi:10.7717/peerj.7578)
Supplement: Supplemental Information 1 [file peerj-07-7578-s001.xlsx]

## Sheet: Tabelle1
	Temperature: 22°C																		Temperature: 7°C																		Arithmetic averages									Power test, two-sided, alpha = 0,05, for EMPT 22°C			Power test, two-sided, alpha = 0,05, for EMPT 7°C
	Test 1						Test 2						Test 3						Test 4						Test 5						Test 6
Product	Mass, total [g]	Mass, emptied package [g]	Mass, cleaned packaging [g]	Mass, food residues [g]	Mass, food [g]	EMPT [%]	Mass, total [g]	Mass, emptied package [g]	Mass, cleaned packaging [g]	Mass, food residues [g]	Mass, food [g]	EMPT [%]	Mass, total [g]	Mass, emptied package [g]	Mass, cleaned packaging [g]	Mass, food residues [g]	Mass, food [g]	EMPT [%]	Mass, total [g]	Mass, emptied package [g]	Mass, cleaned packaging [g]	Mass, food residues [g]	Mass, food [g]	EMPT [%]	Mass, total [g]	Mass, emptied package [g]	Mass, cleaned packaging [g]	Mass, food residues [g]	Mass, food [g]	EMPT [%]	Mass, total [g]	Mass, emptied package [g]	Mass, cleaned packaging [g]	Mass, food residues [g]	Mass, food [g]	EMPT [%]	Mass, food [g]	Mass, packaging [g]	Mass, food residues [g]	EMPT, at 22°C [%]	Standard deviation of EMPT, at 22°C [%]	EMPT, at 7°C [%]	Standard deviation of EMPT, at 7°C [%]	EMPT, total [%]	Standard deviation of EMPT, total [%]	Cohen's d for power of 0.80	Variability [Percentage points]	Variability [Percent]	Cohen's d for power of 0.80
Buttermilk | Beverage carton, bottle top, variant a	542.05	43.01	23.14	19.87	518.91	0.0382918	542.86	44.02	23.39	20.63	519.47	0.0397136	540.1	41.23	23.08	18.15	517.02	0.035105	540.66	43.76	23.28	20.48	517.38	0.0395841	540.71	45.34	23.36	21.98	517.35	0.0424857	541.3	45.42	23.02	22.4	518.28	0.0432199	518.068	23.2117	20.585	0.0377035	0.00235993	0.0417632	0.00192258	0.0397333	0.00294121	3.26197	0.007698	0.204172	3.26197
Buttermilk | Beverage carton, bottle top, variant b	542.74	42.83	23.3	19.53	519.44	0.0375982	541.71	43.34	23.32	20.02	518.39	0.0386196	542.11	41.98	23.33	18.65	518.78	0.0359497	542.31	45.84	23.24	22.6	519.07	0.0435394	541.99	43.78	23.2	20.58	518.79	0.0396692	540.57	44.31	23.29	21.02	517.28	0.0406356	518.625	23.28	20.4	0.0373892	0.00134714	0.0412814	0.00201429	0.0393353	0.0026256	3.26197	0.00439433	0.117529	3.26197
Buttermilk | Beverage carton, gable top	524.44	38.02	21.54	16.48	502.9	0.0327699	524.8	37.78	21.4	16.38	503.4	0.0325387	525.23	38.85	21.63	17.22	503.6	0.0341938	517.87	39.5	22.33	17.17	495.54	0.0346491	528.07	39.33	22.17	17.16	505.9	0.0339197	529.43	39.12	22.05	17.07	507.38	0.0336434	503.12	21.8533	16.9133	0.0331675	0.000896299	0.0340707	0.00051955	0.0336191	0.00082102	3.26197	0.0029237	0.0881495	3.26197
Cafe Latté | PET bottle	498.62	27.62	25.25	2.37	473.37	0.00500665	496.57	27.3	25.14	2.16	471.43	0.0045818	499.97	27.68	25.33	2.35	474.64	0.00495112	498.42	27.74	25.18	2.56	473.24	0.00540952	495.43	27.96	25.13	2.83	470.3	0.00601744	496.21	27.83	25.13	2.7	471.08	0.00573151	472.343	25.1933	2.495	0.00484653	0.000230932	0.00571949	0.000304137	0.00528301	0.000535677	3.26197	0.000753292	0.155429	3.26197
Cafe Latté | PP cup	176.35	15.99	13.97	2.02	162.38	0.01244	275.26	15.82	13.75	2.07	261.51	0.00791557	276.3	16.06	13.86	2.2	262.44	0.00838287	275.05	18.46	13.85	4.61	261.2	0.0176493	276.18	17.78	14	3.78	262.18	0.0144176	276.08	17.61	13.9	3.71	262.18	0.0141506	245.315	13.8883	3.065	0.00957946	0.00248825	0.0154058	0.0019475	0.0124926	0.00376532	3.26197	0.0081166	0.847292	3.26197
Chocolate milk | Beverage carton, flat top	272.99	12.89	9.87	3.02	263.12	0.0114777	271.78	13	9.93	3.07	261.85	0.0117243	272.13	12.69	9.91	2.78	262.22	0.0106018	271.57	13.79	9.99	3.8	261.58	0.0145271	272.91	13.24	9.99	3.25	262.92	0.0123612	272.41	13.88	9.94	3.94	262.47	0.0150112	262.36	9.93833	3.31	0.0112679	0.000589906	0.0139665	0.00141117	0.0126172	0.00176649	3.26197	0.00192426	0.170773	3.26197
Chocolate milk | PET bottle, variant a	451.25	25.11	21.34	3.77	429.66	0.00877438	447.33	24.67	21.25	3.42	426.08	0.00802666	450.33	25.18	21.29	3.89	429.04	0.00906675	451.25	24.99	21.28	3.71	429.97	0.00862851	450.86	24.39	21.3	3.09	429.56	0.00719341	449.29	24.14	21.37	2.77	427.92	0.00647317	428.705	21.305	3.44167	0.0086226	0.000536401	0.0074317	0.00109725	0.00802715	0.00101101	3.26197	0.00174972	0.202923	3.26197
Chocolate milk | PET bottle, variant b	786.43	38.07	31.24	6.83	755.19	0.00904408	779.74	38.25	31.05	7.2	748.69	0.0096168	780.12	37.75	31	6.75	749.12	0.00901057	780.29	38.59	30.88	7.71	749.41	0.0102881	782.21	39.55	31.02	8.53	751.19	0.0113553	779.92	38.4	30.81	7.59	749.11	0.010132	750.452	31	7.435	0.00922382	0.000340743	0.0105918	0.000665804	0.00990781	0.000886105	3.26197	0.00111149	0.120503	3.26197
Cream, 23% fat |Beverage carton, flat top	211.82	16.84	8.54	8.3	203.28	0.0408304	212.34	16.91	8.53	8.38	203.81	0.0411167	209.16	16.78	8.55	8.23	200.61	0.0410249	208.1	16.57	8.55	8.02	199.55	0.0401904	208.99	17.7	8.45	9.25	200.54	0.0461255	209.56	16.91	8.52	8.39	201.04	0.041733	201.472	8.52333	8.42833	0.0409907	0.000146206	0.042683	0.00307945	0.0418368	0.00215891	3.26197	0.00047692	0.0116348	3.26197
Cream, 36% fat | HDPE bottle	276.88	27.17	24.97	2.2	251.91	0.00873328	279.39	26.94	24.88	2.06	254.51	0.00809398	274.5	26.76	24.55	2.21	249.95	0.00884177	275.41	27.82	25.81	2.01	249.6	0.00805288	275.93	27.83	25.74	2.09	250.19	0.00835365	277.41	27.59	25.67	1.92	251.74	0.00762692	251.317	25.27	2.08167	0.00855634	0.000404072	0.00801115	0.00036516	0.00828375	0.00045587	3.26197	0.00131807	0.154046	3.26197
Cream, 36% fat | PS cup	256.58	9.35	7.49	1.86	249.09	0.00746718	257.84	9.4	7.59	1.81	250.25	0.00723277	261.56	9.1	7.38	1.72	254.18	0.00676686	258.83	9.11	7.48	1.63	251.35	0.00648498	257.82	8.77	7.44	1.33	250.38	0.00531193	259.65	9.04	7.46	1.58	252.19	0.00626512	251.24	7.47333	1.655	0.0071556	0.000356481	0.00602067	0.000623561	0.00658814	0.000769923	3.26197	0.00116283	0.162506	3.26197
Curd cheese, creamy | PS tub	262.75	10.13	8.35	1.78	254.4	0.00699686	262.28	10.69	8.49	2.2	253.79	0.00866858	262.96	10.53	8.47	2.06	254.49	0.00809462	262.25	9.76	8.53	1.23	253.72	0.00484786	263.18	9.96	8.46	1.5	254.72	0.00588882	261.25	9.85	8.34	1.51	252.91	0.0059705	254.005	8.44	1.71333	0.00792002	0.000849431	0.00556906	0.00062591	0.00674454	0.00145032	3.26197	0.00277082	0.34985	3.26197
Curd cheese, crumbly | PS tub	266.3	9.23	8.22	1.01	258.08	0.00391352	263.76	8.94	8.42	0.52	255.34	0.0020365	262.13	8.97	8.43	0.54	253.7	0.0021285	263.32	9.22	8.49	0.73	254.83	0.00286465	260.64	8.7	8.24	0.46	252.4	0.0018225	261.61	9.06	8.51	0.55	253.1	0.00217305	254.575	8.385	0.635	0.00269284	0.00105814	0.00228674	0.000530295	0.00248979	0.000780911	3.26197	0.00345161	1.28178	3.26197
Fresh cheese, herbs | PP tub	162.64	9.77	8.74	1.03	153.9	0.00669266	158.45	9.56	8.88	0.68	149.57	0.00454637	159.04	9.33	8.62	0.71	150.42	0.00472012	162.74	9.57	8.94	0.63	153.8	0.00409623	161.52	9.15	8.65	0.5	152.87	0.00327075	162.83	9.49	8.81	0.68	154.02	0.00441501	152.43	8.77333	0.705	0.00531971	0.00119217	0.00392733	0.000590531	0.00462352	0.00113561	3.26197	0.00388883	0.731023	3.26197
Fresh cheese, radish | PP tub, variant a	165.29	14.32	13.49	0.83	151.8	0.00546772	164.37	14.36	13.59	0.77	150.78	0.00510678	163.54	14.17	13.63	0.54	149.91	0.00360216	163.52	14.37	13.5	0.87	150.02	0.00579923	166.12	14.14	13.55	0.59	152.57	0.00386708	163.79	14.2	13.51	0.69	150.28	0.00459143	150.893	13.545	0.715	0.00472555	0.000989483	0.00475258	0.000976103	0.00473907	0.000879182	3.26197	0.00322766	0.683023	3.26197
Fresh cheese, radish | PP tub, variant b	211.95	14	12.98	1.02	198.97	0.0051264	211.36	13.82	12.93	0.89	198.43	0.00448521	208.03	13.98	13	0.98	195.03	0.00502487	214.18	14.24	13.27	0.97	200.91	0.00482803	213.07	14.11	13.17	0.94	199.9	0.00470235	211.86	14	13.26	0.74	198.6	0.00372608	198.64	13.1017	0.923333	0.00487883	0.000344642	0.00441882	0.000603212	0.00464882	0.000506496	3.26197	0.00112421	0.230427	3.26197
Fresh cheese, sweet pepper | PP tub	210.63	13.47	12.73	0.74	197.9	0.00373926	217.88	13.75	12.89	0.86	204.99	0.00419533	217.74	13.87	12.98	0.89	204.76	0.00434655	213.94	13.72	13.09	0.63	200.85	0.00313667	217.7	13.88	13.08	0.8	204.62	0.00390969	214.62	14.17	13.18	0.99	201.44	0.00491461	202.427	12.9917	0.818333	0.00409371	0.000316139	0.00398699	0.00089149	0.00404035	0.000601079	3.26197	0.00103124	0.251907	3.26197
Fresh cheese, sweetened | PS cup	51.58	2.44	2.25	0.19	49.33	0.00385161	52.61	2.6	2.35	0.25	50.26	0.00497413	52.43	2.56	2.34	0.22	50.09	0.00439209	50.91	2.51	2.28	0.23	48.63	0.00472959	51.36	2.52	2.28	0.24	49.08	0.00488998	51.85	2.55	2.26	0.29	49.59	0.00584795	49.4967	2.29333	0.236667	0.00440595	0.00056139	0.00515584	0.000604728	0.00478089	0.000664111	3.26197	0.00183124	0.415628	3.26197
L-free skimmed milk | Beverage carton, gable top	1060.67	32.65	29.18	3.47	1031.49	0.00336407	1060.19	33.2	29.28	3.92	1030.91	0.00380247	1059.39	33.14	29.62	3.52	1029.77	0.00341824	1060.23	33.63	29.79	3.84	1030.44	0.00372656	1060.57	33.12	29.32	3.8	1031.25	0.00368485	1061.08	32.72	29.58	3.14	1031.5	0.00304411	1030.89	29.4617	3.615	0.00352826	0.000239012	0.00348517	0.000382541	0.00350672	0.000286256	3.26197	0.000779649	0.220973	3.26197
Liquid yogurt |Beverage carton, bottle top	522.78	44.14	21.76	22.38	501.02	0.0446689	522.58	43.04	21.58	21.46	501	0.0428343	522.61	43.91	21.59	22.32	501.02	0.0445491	522.81	44.47	21.54	22.93	501.27	0.0457438	522.35	43	21.86	21.14	500.49	0.0422386	522.74	42.99	21.61	21.38	501.13	0.0426636	500.988	21.6567	21.935	0.0440174	0.00102635	0.0435487	0.00191289	0.0437831	0.00139676	3.26197	0.00334793	0.0760591	3.26197
Liquid yogurt |Beverage carton, gable top	528.15	42.95	21.61	21.34	506.54	0.042129	528.3	41.01	21.67	19.34	506.63	0.0381738	526.74	44.38	21.6	22.78	505.14	0.0450964	526.78	44.01	21.77	22.24	505.01	0.0440387	528.7	42.35	21.71	20.64	506.99	0.0407109	527.92	42.35	21.71	20.64	506.21	0.0407736	506.087	21.6783	21.1633	0.0417997	0.00347302	0.0418411	0.0019035	0.0418204	0.00250491	3.26197	0.0113289	0.271028	3.26197
Liquid yogurt, blueberries | PET bottle	376.12	46.65	25.05	21.6	351.07	0.0615262	377.53	45.13	24.89	20.24	352.64	0.0573956	376	46.1	25.15	20.95	350.85	0.0597121	372.6	44.17	25.08	19.09	347.52	0.0549321	371.94	45.96	25.16	20.8	346.78	0.0599804	374.16	43.98	25.16	18.82	349	0.0539255	349.643	25.0817	20.25	0.0595447	0.00207036	0.0562793	0.00324449	0.057912	0.00302059	3.26197	0.00675345	0.113418	3.26197
Liquid yogurt, strawberry | PET bottle	133.46	8.9	7.08	1.82	126.38	0.014401	134	9.1	7.08	2.02	126.92	0.0159155	133.17	8.95	7.09	1.86	126.08	0.0147525	133.86	9.07	7.25	1.82	126.61	0.0143749	133.33	9.05	7.18	1.87	126.15	0.0148236	130.05	8.82	7.4	1.42	122.65	0.0115777	125.798	7.18	1.80167	0.015023	0.000792667	0.013592	0.00175888	0.0143075	0.00145021	3.26197	0.00258565	0.172113	3.26197
Liquid yogurt, vanilla | PET bottle	524.22	33.26	25.02	8.24	499.2	0.0165064	525.95	32.88	25.01	7.87	500.94	0.0157105	525.58	33.8	24.97	8.83	500.61	0.0176385	527.97	36.5	25.14	11.36	502.83	0.0225921	526.14	36.52	24.92	11.6	501.22	0.0231435	526.91	35.76	24.91	10.85	502	0.0216135	501.133	24.995	9.79167	0.0166185	0.000968879	0.0224497	0.000774868	0.0195341	0.00328889	3.26197	0.00316045	0.190177	3.26197
Low-fat cream alternative | PET bottle	279.83	33.09	23.14	9.95	256.69	0.0387627	279.95	33.12	23.29	9.83	256.66	0.0382997	280.26	33.19	23.24	9.95	257.02	0.0387129	281	33.42	23.34	10.08	257.66	0.0391213	279.56	33.3	23.37	9.93	256.19	0.0387603	281.11	33.03	23.37	9.66	257.74	0.0374796	256.993	23.2917	9.9	0.0385918	0.000254175	0.0384537	0.000862708	0.0385228	0.000573816	3.26197	0.000829111	0.0214841	3.26197
Low-fat cream alternative | Pouch	210.35	8.28	5.67	2.61	204.68	0.0127516	209.69	8.8	5.67	3.13	204.02	0.0153416	210.01	8.72	5.66	3.06	204.35	0.0149743	209.47	7.08	5.65	1.43	203.82	0.00701599	210.47	7.43	5.62	1.81	204.85	0.00883573	210.11	7.12	5.64	1.48	204.47	0.00723823	204.365	5.65167	2.25333	0.0143559	0.0014014	0.00769665	0.000992712	0.0110263	0.00380569	3.26197	0.00457132	0.318429	3.26197
Low-fat milk | Beverage carton, flat top	1067.43	33.4	29.95	3.45	1037.48	0.00332537	1061.81	33.25	29.65	3.6	1032.16	0.00348783	1066.12	33.38	29.67	3.71	1036.45	0.00357953	1061.74	34.61	29.72	4.89	1032.02	0.00473828	1061.33	35.6	29.72	5.88	1031.61	0.00569983	1066.65	34.99	29.77	5.22	1036.88	0.00503433	1034.43	29.7467	4.45833	0.00346424	0.000128712	0.00515748	0.000492461	0.00431086	0.000981709	3.26197	0.000419855	0.121197	3.26197
Low-fat milk |Beverage carton, gable top	1071.48	40.79	36.35	4.44	1035.13	0.00428932	1071.58	40.39	36.58	3.81	1035	0.00368116	1070.91	39.43	35.33	4.1	1035.58	0.00395913	1071.37	41	35.71	5.29	1035.66	0.00510785	1068.45	40.45	35.48	4.97	1032.97	0.00481137	1071.81	41.27	35.73	5.54	1036.08	0.00534708	1035.07	35.8633	4.69167	0.00397654	0.000304452	0.00508877	0.000268364	0.00453265	0.00066106	3.26197	0.000993112	0.249743	3.26197
Sour milk | PP cup	193.77	9.56	8.18	1.38	185.59	0.00743575	190.95	9.48	8.31	1.17	182.64	0.00640604	193.82	9.63	8.12	1.51	185.7	0.00813139	193.38	8.79	8.23	0.56	185.15	0.00302457	190.73	8.92	8.4	0.52	182.33	0.00285197	193.28	8.63	8.1	0.53	185.18	0.00286208	184.432	8.22333	0.945	0.00732439	0.000868048	0.00291288	9.68663e-05	0.00511864	0.00247863	3.26197	0.00283155	0.386591	3.26197
Sour milk | PS cup	208.41	9.51	7.73	1.78	200.68	0.00886984	207.89	9.43	7.81	1.62	200.08	0.00809676	207.58	9.37	7.86	1.51	199.72	0.00756058	209.1	9.01	7.67	1.34	201.43	0.00665244	209.39	9.21	7.65	1.56	201.74	0.00773273	209.21	8.94	7.69	1.25	201.52	0.00620286	200.862	7.735	1.51	0.00817573	0.000658191	0.00686267	0.000786304	0.0075192	0.000968417	3.26197	0.002147	0.262607	3.26197
Whole milk | Beverage carton, gable top	1060.35	32.165	28.89	3.275	1031.46	0.00317511	1060.78	31.6	29.012	2.588	1031.77	0.00250832	1060.23	31.85	28.9	2.95	1031.33	0.00286038	1060.77	32.26	28.963	3.297	1031.81	0.00319537	1060.8	32.27	28.66	3.61	1032.14	0.00349759	1060.11	32.44	28.69	3.75	1031.42	0.00363576	1031.65	28.8525	3.245	0.00284794	0.000333572	0.00344291	0.000225234	0.00314542	0.000413517	3.26197	0.0010881	0.382066	3.26197
Whole milk | Glass bottle	1465.78	435.91	432.55	3.36	1033.23	0.00325194	1465.47	434.77	431.61	3.16	1033.86	0.00305651	1464.99	435.49	432.43	3.06	1032.56	0.00296351	1464.63	435.52	432.19	3.33	1032.44	0.00322537	1463.66	435.1	431.47	3.63	1032.19	0.00351679	1464.18	434.99	431.61	3.38	1032.57	0.00327339	1032.81	431.977	3.32	0.00309065	0.000147215	0.00333852	0.000156249	0.00321458	0.000192004	3.26197	0.000480212	0.155376	3.26197
Yogurt, cereals | PS cup	184.67	10.41	9.2	1.21	175.47	0.00689577	183.74	10.31	9.12	1.19	174.62	0.0068148	183.53	10.35	9.22	1.13	174.31	0.0064827	184.35	10.33	9.15	1.18	175.2	0.00673516	183.95	10.3	9.18	1.12	174.77	0.00640842	184.52	10.43	9.14	1.29	175.38	0.00735546	174.958	9.16833	1.18667	0.00673109	0.000218885	0.00683301	0.00048104	0.00678205	0.000338882	3.26197	0.000713995	0.106074	3.26197
Yogurt, chocolate | PS cup	139.06	10.76	9.48	1.28	129.58	0.00987807	139.26	11.4	9.43	1.97	129.83	0.0151737	139.26	11.3	9.44	1.86	129.82	0.0143275	138.79	10.91	9.49	1.42	129.3	0.0109822	140.52	10.49	9.11	1.38	131.41	0.0105015	141.24	10.45	9.16	1.29	132.08	0.00976681	130.337	9.35167	1.53333	0.0131264	0.0028448	0.0104168	0.000612108	0.0117716	0.00236423	3.26197	0.00927965	0.706944	3.26197
Yogurt, fruits | Twin-PP cup	180.33	21.06	17.89	3.17	162.44	0.0195149	178.72	20.68	17.83	2.85	160.89	0.017714	174.9	20.05	17.83	2.22	157.07	0.0141338	180.53	20.98	17.85	3.13	162.68	0.0192402	180.44	20.47	17.72	2.75	162.72	0.0169002	178.79	20.3	17.82	2.48	160.97	0.0154066	161.128	17.8233	2.76667	0.0171209	0.00273912	0.0171823	0.00193233	0.0171516	0.00212033	3.26197	0.00893493	0.521873	3.26197
Yogurt, vanilla | PS cup	185.74	7.46	5.86	1.6	179.88	0.00889482	185.93	7.67	5.86	1.81	180.07	0.0100516	186.35	7.25	5.55	1.7	180.8	0.00940265	185.67	7.8	5.9	1.9	179.77	0.0105691	186.92	8.09	5.59	2.5	181.33	0.013787	184.53	7.73	5.63	2.1	178.9	0.0117384	180.125	5.73167	1.935	0.00944971	0.000579847	0.0120315	0.00162888	0.0107406	0.00178759	3.26197	0.00189144	0.200159	3.26197
[truncated: 5 more columns]
