# Supplementary material for: Technical emptiability of dairy product packaging and its environmental implications in Austria
Source: PeerJ. 2019 Sep 10;7:e7578. doi: 10.7717/peerj.7578 (PMC6743449; doi:10.7717/peerj.7578)
Supplement: Supplemental Information 2 — Type and mass of each packaging material, dairy product ingredients and Ecoinvent datasets used for each product [file peerj-07-7578-s002.xlsx]

## Sheet: Tabelle1
Product	Packaging description, assumed type of material and measured mass of packaging components	Ecoinvent datasets for packaging				Content per package		Nutrition facts				Estimated list of ingredients	Ecoinvent datasets for ingredients
		Raw materials	Manufacturing process	Incineration/Landfill	Recycling	Mass [g]	Volume [mL] (*Volumes for non-liquid products were measured)	Fat (g/100g)	Carbo-hydrates (g/100g)	Protein (g/100g)	Salt (g/100g)
L-free skimmed milk | Beverage carton, gable top	26.85 g beverage carton, aseptic (with gable top)	Liquid packaging board production | liquid packaging board | Cutoff, S - RER	Liquid packaging board container production | liquid packaging board container | Cutoff, U - RER Beverage carton converting | beverage carton converting | Cutoff, U	treatment of waste paperboard, municipal incineration | waste paperboard | Cutoff, U - RoW; treatment of waste polyethylene, municipal incineration | waste polyethylene | Cutoff, U - RoW; treatment of waste scrap aluminium, municipal incineration | scrap aluminium | Cutoff, U - Europe without Switzerland; treatment of biowaste, municipal incineration with fly ash extraction | biowaste | Cutoff, U…	treatment of waste paper to pulp, wet lap, totally chlorine free bleached | deinked pulp, wet lap | Cutoff, U	1030.89	1000	1.8	4.8	3.4	0.1	100% milk	milk production, from cow | cow milk | Cutoff, U - RoW (adapted for Austria, see Table S1)
	2.61 g HDPE closure	polyethylene production, high density, granulate | polyethylene, high density, granulate | Cutoff, U - RER	injection moulding | injection moulding | Cutoff, U - RER	treatment of waste polyethylene, municipal incineration | waste polyethylene | Cutoff, U - RoW	n.a.
Low-fat milk | Beverage carton, flat top	26.85 g beverage carton, aseptic (with flat top)	Liquid packaging board production | liquid packaging board | Cutoff, S - RER	Liquid packaging board container production | liquid packaging board container | Cutoff, U - RER Beverage carton converting | beverage carton converting | Cutoff, U	treatment of waste paperboard, municipal incineration | waste paperboard | Cutoff, U - RoW; treatment of waste polyethylene, municipal incineration | waste polyethylene | Cutoff, U - RoW; treatment of waste scrap aluminium, municipal incineration | scrap aluminium | Cutoff, U - Europe without Switzerland; treatment of biowaste, municipal incineration with fly ash extraction | biowaste | Cutoff, U…	treatment of waste paper to pulp, wet lap, totally chlorine free bleached | deinked pulp, wet lap | Cutoff, U	1034.43	1000	0.5	4.9	3.5	0.13	100% milk	milk production, from cow | cow milk | Cutoff, U - RoW (adapted for Austria, see Table S1)
	1.30 g HDPE closure	polyethylene production, high density, granulate | polyethylene, high density, granulate | Cutoff, U - RER	injection moulding | injection moulding | Cutoff, U - RER	treatment of waste polyethylene, municipal incineration | waste polyethylene | Cutoff, U - RoW	n.a.
	1.49 g PP closure/snap ring	polypropylene production, granulate | polypropylene, granulate | Cutoff, U - RER	injection moulding | injection moulding | Cutoff, U - RER	treatment of waste polypropylene, municipal incineration | waste polypropylene | Cutoff, U - CH	n.a.
Low-fat milk | Beverage carton, gable top	33.38 g beverage carton, aseptic (with gable top)	Liquid packaging board production | liquid packaging board | Cutoff, S - RER	Liquid packaging board container production | liquid packaging board container | Cutoff, U - RER Beverage carton converting | beverage carton converting | Cutoff, U	treatment of waste paperboard, municipal incineration | waste paperboard | Cutoff, U - RoW treatment of waste polyethylene, municipal incineration | waste polyethylene | Cutoff, U - RoW treatment of watse scrap aluminium, municipal incineration | scrap aluminium | Cutoff, U - Europe without Switzerland treatment of biowaste, municipal incineration with fly ash extraction | biowaste | Cutoff, U - …	treatment of waste paper to pulp, wet lap, totally chlorine free bleached | deinked pulp, wet lap | Cutoff, U	1035.07	1000	0.5	4.8	3.4	0.13	100% milk	milk production, from cow | cow milk | Cutoff, U - RoW (adapted for Austria, see Table S1)
	2.48 g HDPE closure	polyethylene production, high density, granulate | polyethylene, high density, granulate | Cutoff, U - RER	injection moulding | injection moulding | Cutoff, U - RER	treatment of waste polyethylene, municipal incineration | waste polyethylene | Cutoff, U - RoW	n.a.
Whole milk | Beverage carton, gable top	26.40 g beverage carton (with gable top)	Liquid packaging board production | liquid packaging board | Cutoff, S - RER	Liquid packaging board container production | liquid packaging board container | Cutoff, U - RER Beverage carton converting | beverage carton converting | Cutoff, U	treatment of waste paperboard, municipal incineration | waste paperboard | Cutoff, U - RoW treatment of waste polyethylene, municipal incineration | waste polyethylene | Cutoff, U - RoW treatment of biowaste, municipal incineration with fly ash extraction | biowaste | Cutoff, U - CH	treatment of waste paper to pulp, wet lap, totally chlorine free bleached | deinked pulp, wet lap | Cutoff, U	1031.65	1000	3.5	4.8	3.3	0.13	100% milk	milk production, from cow | cow milk | Cutoff, U - RoW (adapted for Austria, see Table S1)
	2.45 g HDPE closure	polyethylene production, high density, granulate | polyethylene, high density, granulate | Cutoff, U - RER	injection moulding | injection moulding | Cutoff, U - RER	treatment of waste polyethylene, municipal incineration | waste polyethylene | Cutoff, U - RoW	n.a.
Whole milk | Glass bottle	422.99 g packaging glass bottle, white	packaging glass production, white | packaging glass, white | Cutoff, U – RER w/o CH+DE [electricity provider changed to Austrian electricity mix; two datasets for 0% and 100% cullets content with the assumption of 2.5% energy reduction per 10% cullets content modelled] - 60% glass cullets content for analyzed bottle assumed		treatment of waste glass, inert material landfill | waste glass | Cutoff, U - CH	see comments for packaging glass production	1032.81	1000	3.5	4.8	3.4	0.13	100% milk	milk production, from cow | cow milk | Cutoff, U - RoW (adapted for Austria, see Table S1)
	7.30 g aluminium closure	market for aluminium, wrought alloy | aluminium, wrought alloy | Cutoff, U - RER	sheet rolling, aluminium |sheet rolling, aluminium | Cutoff, U	treatment of waste scrap aluminium, municipal incineration | scrap aluminium | Cutoff, U - Europe without Switzerland; treatment of waste aluminium, sanitary landfill | waste aluminium | Cutoff, U	treatment of aluminium scrap, post-consumer, prepared for recycling, at remelter | aluminium, wrought alloy | Cutoff, U - RER
	1.69 g paper label	paper production, woodcontaining, lightweight coated | paper, woodcontaining, lightweight coated | Cutoff, U - RER		treatment of waste paperboard, municipal incineration | waste paperboard | Cutoff, U - RoW	n.a.
Cafe latte | PET bottle	20.61 g PET bottle	polyethylene terephthalate production, granulate, bottle grade | polyethylene terephthalate, granulate, bottle grade | Cutoff, U - RER	stretch blow moulding | stretch blow moulding | Cutoff, U - RER	treatment of waste polyethylene terephthalate, municipal incineration | waste polyethylene terephthalate | Cutoff, U - RoW	n.a.	472.34	450	4.2	9.3	3	0.12	80.0% milk	milk production, from cow | cow milk | Cutoff, U - RoW (adapted for Austria, see Table S1)
	1.91 g PET sleeve	polyethylene terephthalate production, granulate, amorphous | polyethylene terephthalate, granulate, amorphous | Cutoff, U - RER	extrusion, plastic film | extrusion, plastic film | Cutoff, U - RER	treatment of waste polyethylene terephthalate, municipal incineration | waste polyethylene terephthalate | Cutoff, U - RoW	n.a.							18.2% added water	market for tap water | tap water | Cutoff, U - Europe without Switzerland
	2.99 g HDPE closure	polyethylene production, high density, granulate | polyethylene, high density, granulate | Cutoff, U - RER	injection moulding | injection moulding | Cutoff, U - RER	treatment of waste polyethylene, municipal incineration | waste polyethylene | Cutoff, U - RoW	n.a.							9.0% sugar	market for sugar, from sugar beet | sugar, from sugar beet | Cutoff, U - GLO
												0.8% coffee extract	market for coffee, green bean | coffee, green bean | Cutoff, U - GLO; supplemented with data from (Phrommarat, 2019) on roasting and grinding
Cafe latte | PP cup	5.38 PP cup	polypropylene production, granulate | polypropylene, granulate | Cutoff, U - RER	extrusion of plastic sheets and thermoforming, inline | extrusion of plastic sheets and thermoforming, inline | Cutoff, U - RoW	treatment of waste polypropylene, municipal incineration | waste polypropylene | Cutoff, U - CH	n.a.	245.32	250	4.1	8.5	2.9	0.18	78.0% milk	milk production, from cow | cow milk | Cutoff, U - RoW (adapted for Austria, see Table S1)
	4.81 g cardboard sleeve	solid bleached board production | solid bleached board | Cutoff, U - RER	carton board box production service, with offset printing | carton board box production, with offset printing | Cutoff, U - RoW	treatment of waste paperboard, municipal incineration | waste paperboard | Cutoff, U - RoW	n.a.							16.2% added water	market for tap water | tap water | Cutoff, U - Europe without Switzerland
	3.19 g PET cap	polyethylene terephthalate production, granulate, amorphous | polyethylene terephthalate, granulate, amorphous | Cutoff, U - RER	extrusion of plastic sheets and thermoforming, inline | extrusion of plastic sheets and thermoforming, inline | Cutoff, U - RoW	treatment of waste polyethylene terephthalate, municipal incineration | waste polyethylene terephthalate | Cutoff, U - RoW	n.a.							5.0% sugar	market for sugar, from sugar beet | sugar, from sugar beet | Cutoff, U - GLO
	0.51 g aluminum lid	market for aluminium, wrought alloy | aluminium, wrought alloy | Cutoff, U - RER	sheet rolling, aluminium |sheet rolling, aluminium | Cutoff, U	treatment of waste scrap aluminium, municipal incineration | scrap aluminium | Cutoff, U - Europe without Switzerland; treatment of waste aluminium, sanitary landfill | waste aluminium | Cutoff, U	n.a.							0.8% coffee bean	market for coffee, green bean | coffee, green bean | Cutoff, U - GLO; supplemented with data from (Phrommarat, 2019) on roasting and grinding
Chocolate milk | Beverage carton, flat top	9.54 g beverage carton (with flat top)	Liquid packaging board production | liquid packaging board | Cutoff, S - RER	Liquid packaging board container production | liquid packaging board container | Cutoff, U - RER Beverage carton converting | beverage carton converting | Cutoff, U	treatment of waste paperboard, municipal incineration | waste paperboard | Cutoff, U - RoW; treatment of waste polyethylene, municipal incineration | waste polyethylene | Cutoff, U - RoW; treatment of biowaste, municipal incineration with fly ash extraction | biowaste | Cutoff, U - CH	treatment of waste paper to pulp, wet lap, totally chlorine free bleached | deinked pulp, wet lap | Cutoff, U	262.36	250	1.5	8.8	3.4	0.13	93.4% milk	milk production, from cow | cow milk | Cutoff, U - RoW (adapted for Austria, see Table S1)
	0.4 g PP (drinking straw)	polypropylene production, granulate | polypropylene, granulate | Cutoff, U - RER	injection moulding | injection moulding | Cutoff, U - RER	treatment of waste polypropylene, municipal incineration | waste polypropylene | Cutoff, U - CH	n.a.							5.0% sugar	market for sugar, from sugar beet | sugar, from sugar beet | Cutoff, U - GLO
												1.1% cocoa bean	market for cocoa bean | cocoa bean | Cutoff, U – GLO
												0.5% starch	market for maize starch | maize starch | Cutoff, U - GLO
Chocolate milk | PET bottle, variant a	16.60 g PET bottle	polyethylene terephthalate production, granulate, bottle grade | polyethylene terephthalate, granulate, bottle grade | Cutoff, U - RER	stretch blow moulding | stretch blow moulding | Cutoff, U - RER	treatment of waste polyethylene terephthalate, municipal incineration | waste polyethylene terephthalate | Cutoff, U - RoW	n.a.	428.71	400	1.5	12.3	3.2	0.15	95.6% milk	milk production, from cow | cow milk | Cutoff, U - RoW (adapted for Austria, see Table S1)
	3.06 g HDPE closure	polyethylene production, high density, granulate | polyethylene, high density, granulate | Cutoff, U - RER	injection moulding | injection moulding | Cutoff, U - RER	treatment of waste polyethylene, municipal incineration | waste polyethylene | Cutoff, U - RoW	n.a.							2.0% cocoa bean	market for cocoa bean | cocoa bean | Cutoff, U – GLO
	1.65 g OPS sleeve	polystyrene production, general purpose | polystyrene, general purpose | Cutoff, U	extrusion, plastic film | extrusion, plastic film | Cutoff, U - RER	treatment of waste polystyrene, municipal incineration | waste polystyrene | Cutoff, U - RoW	n.a.							1.9% sugar	market for sugar, from sugar beet | sugar, from sugar beet | Cutoff, U - GLO
												0.5% starch	market for maize starch | maize starch | Cutoff, U - GLO
Chocolate milk | PET bottle, variant b	24.56 PET bottle	polyethylene terephthalate production, granulate, bottle grade | polyethylene terephthalate, granulate, bottle grade | Cutoff, U - RER	stretch blow moulding | stretch blow moulding | Cutoff, U - RER	treatment of waste polyethylene terephthalate, municipal incineration | waste polyethylene terephthalate | Cutoff, U - RoW	n.a.	750.45	707	3.1	12	3.2	0.1	95.6% milk	milk production, from cow | cow milk | Cutoff, U - RoW (adapted for Austria, see Table S1)
	3.42 g PET sleeve	polyethylene terephthalate production, granulate, amorphous | polyethylene terephthalate, granulate, amorphous | Cutoff, U - RER	extrusion, plastic film | extrusion, plastic film | Cutoff, U - RER	treatment of waste polyethylene terephthalate, municipal incineration | waste polyethylene terephthalate | Cutoff, U - RoW	n.a.							2.0% cocoa bean	market for cocoa bean | cocoa bean | Cutoff, U – GLO
	2.95 g HDPE closure	polyethylene production, high density, granulate | polyethylene, high density, granulate | Cutoff, U - RER	injection moulding | injection moulding | Cutoff, U - RER	treatment of waste polyethylene, municipal incineration | waste polyethylene | Cutoff, U - RoW	n.a.							1.9% sugar	market for sugar, from sugar beet | sugar, from sugar beet | Cutoff, U - GLO
	0.07 g aluminum lid	market for aluminium, wrought alloy | aluminium, wrought alloy | Cutoff, U - RER	sheet rolling, aluminium |sheet rolling, aluminium | Cutoff, U	treatment of waste scrap aluminium, municipal incineration | scrap aluminium | Cutoff, U - Europe without Switzerland; treatment of waste aluminium, sanitary landfill | waste aluminium | Cutoff, U	n.a.							0.5% starch	market for maize starch | maize starch | Cutoff, U - GLO
Buttermilk | Beverage carton, bottle top, variant a	19.81 g beverage carton (with bottle-shaped top)	Liquid packaging board production | liquid packaging board | Cutoff, S - RER	Liquid packaging board container production | liquid packaging board container | Cutoff, U - RER Beverage carton converting | beverage carton converting | Cutoff, U	treatment of waste paperboard, municipal incineration | waste paperboard | Cutoff, U - RoW; treatment of waste polyethylene, municipal incineration | waste polyethylene | Cutoff, U - RoW; treatment of biowaste, municipal incineration with fly ash extraction | biowaste | Cutoff, U - CH	treatment of waste paper to pulp, wet lap, totally chlorine free bleached | deinked pulp, wet lap | Cutoff, U	518.07	495	1	4	3.6	0.1	100% milk	milk production, from cow | cow milk | Cutoff, U - RoW (adapted for Austria, see Table S1)
	3.33 g HDPE closure	polyethylene production, high density, granulate | polyethylene, high density, granulate | Cutoff, U - RER	injection moulding | injection moulding | Cutoff, U - RER	treatment of waste polyethylene, municipal incineration | waste polyethylene | Cutoff, U - RoW	n.a.
	0.07 g aluminum lid	market for aluminium, wrought alloy | aluminium, wrought alloy | Cutoff, U - RER	sheet rolling, aluminium |sheet rolling, aluminium | Cutoff, U	treatment of waste scrap aluminium, municipal incineration | scrap aluminium | Cutoff, U - Europe without Switzerland; treatment of waste aluminium, sanitary landfill | waste aluminium | Cutoff, U	n.a.
Buttermilk | Beverage carton, bottle top, variant b	19.91 g beverage carton (with bottle-shaped top)	Liquid packaging board production | liquid packaging board | Cutoff, S - RER	Liquid packaging board container production | liquid packaging board container | Cutoff, U - RER Beverage carton converting | beverage carton converting | Cutoff, U	treatment of waste paperboard, municipal incineration | waste paperboard | Cutoff, U - RoW; treatment of waste polyethylene, municipal incineration | waste polyethylene | Cutoff, U - RoW; treatment of biowaste, municipal incineration with fly ash extraction | biowaste | Cutoff, U - CH	treatment of waste paper to pulp, wet lap, totally chlorine free bleached | deinked pulp, wet lap | Cutoff, U	518.63	495	1	4.1	3.4	0.13	100% milk	milk production, from cow | cow milk | Cutoff, U - RoW (adapted for Austria, see Table S1)
	3.37 g HDPE closure	polyethylene production, high density, granulate | polyethylene, high density, granulate | Cutoff, U - RER	injection moulding | injection moulding | Cutoff, U - RER	treatment of waste polyethylene, municipal incineration | waste polyethylene | Cutoff, U - RoW
Buttermilk | Beverage carton, gable top	19.83 g beverage carton (with gable top)	Liquid packaging board production | liquid packaging board | Cutoff, S - RER	Liquid packaging board container production | liquid packaging board container | Cutoff, U - RER Beverage carton converting | beverage carton converting | Cutoff, U	treatment of waste paperboard, municipal incineration | waste paperboard | Cutoff, U - RoW; treatment of waste polyethylene, municipal incineration | waste polyethylene | Cutoff, U - RoW; treatment of biowaste, municipal incineration with fly ash extraction | biowaste | Cutoff, U - CH	treatment of waste paper to pulp, wet lap, totally chlorine free bleached | deinked pulp, wet lap | Cutoff, U	503.12	495	1	4.1	3.5	0.13	100% milk	milk production, from cow | cow milk | Cutoff, U - RoW (adapted for Austria, see Table S1)
	2.02 g HDPE closure	polyethylene production, high density, granulate | polyethylene, high density, granulate | Cutoff, U - RER	injection moulding | injection moulding | Cutoff, U - RER	treatment of waste polyethylene, municipal incineration | waste polyethylene | Cutoff, U - RoW	n.a.
Sour milk | cardboard-wrapped PP cup	3.44 g PP cup	polypropylene production, granulate | polypropylene, granulate | Cutoff, U - RER	extrusion of plastic sheets and thermoforming, inline | extrusion of plastic sheets and thermoforming, inline | Cutoff, U - RoW	treatment of waste polypropylene, municipal incineration | waste polypropylene | Cutoff, U - CH	n.a.	184.43	224*	2.9	13	3.4	0.11	79.5% milk	milk production, from cow | cow milk | Cutoff, U - RoW (adapted for Austria, see Table S1)
	4.17 g cardboard sleeve	solid bleached board production | solid bleached board | Cutoff, U - RER	carton board box production service, with offset printing | carton board box production, with offset printing | Cutoff, U - RoW	treatment of waste paperboard, municipal incineration | waste paperboard | Cutoff, U - RoW	n.a.							11.0% mango/orange	market for orange, processing grade | orange, processing grade | Cutoff, U - GLO
	0.61 g aluminum lid	market for aluminium, wrought alloy | aluminium, wrought alloy | Cutoff, U - RER	sheet rolling, aluminium |sheet rolling, aluminium | Cutoff, U	treatment of waste scrap aluminium, municipal incineration | scrap aluminium | Cutoff, U - Europe without Switzerland; treatment of waste aluminium, sanitary landfill | waste aluminium | Cutoff, U	n.a.							9.0% sugar	market for sugar, from sugar beet | sugar, from sugar beet | Cutoff, U - GLO
												0.5% starch	market for maize starch | maize starch | Cutoff, U - GLO
Sour milk | PS cup	6.13 g PS cup	polystyrene production, general purpose | polystyrene, general purpose | Cutoff, U	extrusion of plastic sheets and thermoforming, inline | extrusion of plastic sheets and thermoforming, inline | Cutoff, U - RoW	treatment of waste polystyrene, municipal incineration | waste polystyrene | Cutoff, U - RoW	n.a.	200.86	248*	2.6	13.5	3.3	0.1	82.5% milk	milk production, from cow | cow milk | Cutoff, U - RoW (adapted for Austria, see Table S1)
	1.10 OPS sleeve	polystyrene production, general purpose | polystyrene, general purpose | Cutoff, U	extrusion, plastic film | extrusion, plastic film | Cutoff, U - RER	treatment of waste polystyrene, municipal incineration | waste polystyrene | Cutoff, U - RoW	n.a.							9.0% sugar	market for sugar, from sugar beet | sugar, from sugar beet | Cutoff, U - GLO
	0.51 aluminum lid	market for aluminium, wrought alloy | aluminium, wrought alloy | Cutoff, U - RER	sheet rolling, aluminium |sheet rolling, aluminium | Cutoff, U	treatment of waste scrap aluminium, municipal incineration | scrap aluminium | Cutoff, U - Europe without Switzerland; treatment of waste aluminium, sanitary landfill | waste aluminium | Cutoff, U	n.a.							7.0% strawberries	market for strawberry | strawberry | Cutoff, U - GLO
												1.0% glucose	market for glucose | glucose | Cutoff, U - GLO
												0.5% starch	market for maize starch | maize starch | Cutoff, U - GLO
Yogurt, cereals | PS cup	8.41 g PS cup	polystyrene production, general purpose | polystyrene, general purpose | Cutoff, U	extrusion of plastic sheets and thermoforming, inline | extrusion of plastic sheets and thermoforming, inline | Cutoff, U - RoW	treatment of waste polystyrene, municipal incineration | waste polystyrene | Cutoff, U - RoW	n.a.	174.96	265*	4.9	13	14.7	0.22	90.0% milk	milk production, from cow | cow milk | Cutoff, U - RoW (adapted for Austria, see Table S1)
	0.66 g PE/paper lid	paper production, woodcontaining, lightweight coated | paper, woodcontaining, lightweight coated | Cutoff, U - RER;		treatment of waste paperboard, municipal incineration | waste paperboard | Cutoff, U - RoW	n.a.							4.0% grains	market for oat grain | oat grain | Cutoff, U – GLO
	0.10 g paper label	paper production, woodcontaining, lightweight coated | paper, woodcontaining, lightweight coated | Cutoff, U - RER		treatment of waste paperboard, municipal incineration | waste paperboard | Cutoff, U - RoW	n.a.							3.0% sugar	market for sugar, from sugar beet | sugar, from sugar beet | Cutoff, U - GLO
												2.0% glucose	market for glucose | glucose | Cutoff, U - GLO
												1.0% vegetable oil	market for vegetable oil, refined | vegetable oil, refined | Cutoff, U - GLO
Yogurt, chocolate | PS cup	4.99 g PS cup	polystyrene production, general purpose | polystyrene, general purpose | Cutoff, U	extrusion of plastic sheets and thermoforming, inline | extrusion of plastic sheets and thermoforming, inline | Cutoff, U - RoW	treatment of waste polystyrene, municipal incineration | waste polystyrene | Cutoff, U - RoW	n.a.	130.34	165*	3.9	12	4	0.15	95.9% milk	milk production, from cow | cow milk | Cutoff, U - RoW (adapted for Austria, see Table S1)
	0.90 g PET sleeve	polyethylene terephthalate production, granulate, amorphous | polyethylene terephthalate, granulate, amorphous | Cutoff, U - RER	extrusion, plastic film | extrusion, plastic film | Cutoff, U - RER	treatment of waste polyethylene terephthalate, municipal incineration | waste polyethylene terephthalate | Cutoff, U - RoW	n.a.							1.7% sugar	market for sugar, from sugar beet | sugar, from sugar beet | Cutoff, U - GLO
	2.63 g PET cap	polyethylene terephthalate production, granulate, amorphous | polyethylene terephthalate, granulate, amorphous | Cutoff, U - RER	extrusion of plastic sheets and thermoforming, inline | extrusion of plastic sheets and thermoforming, inline | Cutoff, U - RoW	treatment of waste polyethylene terephthalate, municipal incineration | waste polyethylene terephthalate | Cutoff, U - RoW	n.a.							1.2% grains	market for oat grain | oat grain | Cutoff, U – GLO
	0.83 g aluminum lid	market for aluminium, wrought alloy | aluminium, wrought alloy | Cutoff, U - RER	sheet rolling, aluminium |sheet rolling, aluminium | Cutoff, U	treatment of waste scrap aluminium, municipal incineration | scrap aluminium | Cutoff, U - Europe without Switzerland; treatment of waste aluminium, sanitary landfill | waste aluminium | Cutoff, U	n.a.							0.8% cocoa bean	market for cocoa bean | cocoa bean | Cutoff, U – GLO
												0.2% palm oil	market for palm oil, refined | palm oil, refined | Cutoff, U - GLO
Yogurt, fruits | Twin chamber PP cup	10.53 g PP twin chamber cup	polypropylene production, granulate | polypropylene, granulate | Cutoff, U - RER	extrusion of plastic sheets and thermoforming, inline | extrusion of plastic sheets and thermoforming, inline | Cutoff, U - RoW	treatment of waste polypropylene, municipal incineration | waste polypropylene | Cutoff, U - CH	n.a.	161.13	207*	8.5	14	5	0.11	75.0% milk	milk production, from cow | cow milk | Cutoff, U - RoW (adapted for Austria, see Table S1)
	3.80 g PET cap	polyethylene terephthalate production, granulate, amorphous | polyethylene terephthalate, granulate, amorphous | Cutoff, U - RER	extrusion of plastic sheets and thermoforming, inline | extrusion of plastic sheets and thermoforming, inline | Cutoff, U - RoW	treatment of waste polyethylene terephthalate, municipal incineration | waste polyethylene terephthalate | Cutoff, U - RoW	n.a.							11.0% sugar	market for sugar, from sugar beet | sugar, from sugar beet | Cutoff, U - GLO
	1.52 g aluminum lid	market for aluminium, wrought alloy | aluminium, wrought alloy | Cutoff, U - RER	sheet rolling, aluminium |sheet rolling, aluminium | Cutoff, U	treatment of waste scrap aluminium, municipal incineration | scrap aluminium | Cutoff, U - Europe without Switzerland; treatment of waste aluminium, sanitary landfill | waste aluminium | Cutoff, U	n.a.							8.0% fruits	market for strawberry | strawberry | Cutoff, U - GLO; market for apple | apple | Cutoff, U - GLO
	0.34 g paper label	paper production, woodcontaining, lightweight coated | paper, woodcontaining, lightweight coated | Cutoff, U - RER		treatment of waste paperboard, municipal incineration | waste paperboard | Cutoff, U - RoW	n.a.							3.0% grains	market for oat grain | oat grain | Cutoff, U – GLO
	1.63 g PP spoon	polypropylene production, granulate | polypropylene, granulate | Cutoff, U - RER	injection moulding | injection moulding | Cutoff, U - RER	treatment of waste polypropylene, municipal incineration | waste polypropylene | Cutoff, U - CH	n.a.							2.0% starch	market for maize starch | maize starch | Cutoff, U - GLO
												1.0% vegetable oil	market for vegetable oil, refined | vegetable oil, refined | Cutoff, U - GLO
Yogurt, vanilla | PS cup	5.40 g PS cup	polystyrene production, general purpose | polystyrene, general purpose | Cutoff, U	extrusion of plastic sheets and thermoforming, inline | extrusion of plastic sheets and thermoforming, inline | Cutoff, U - RoW	treatment of waste polystyrene, municipal incineration | waste polystyrene | Cutoff, U - RoW	n.a.	180.13	217*	2.6	15	3	0.02	85.5% milk	milk production, from cow | cow milk | Cutoff, U - RoW (adapted for Austria, see Table S1)
	0.43 g aluminum lid	market for aluminium, wrought alloy | aluminium, wrought alloy | Cutoff, U - RER	sheet rolling, aluminium |sheet rolling, aluminium | Cutoff, U	treatment of waste scrap aluminium, municipal incineration | scrap aluminium | Cutoff, U - Europe without Switzerland; treatment of waste aluminium, sanitary landfill | waste aluminium | Cutoff, U	n.a.							13.0% sugar	market for sugar, from sugar beet | sugar, from sugar beet | Cutoff, U - GLO
												1.0% vanilla	market for vanilla | vanilla | Cutoff, U - GLO
												0.5% starch	market for maize starch | maize starch | Cutoff, U - GLO
Liquid yogurt | Beverage carton, bottle top	19.18 g beverage carton (with bottle-shaped top)	Liquid packaging board production | liquid packaging board | Cutoff, S - RER	Liquid packaging board container production | liquid packaging board container | Cutoff, U - RER Beverage carton converting | beverage carton converting | Cutoff, U	treatment of waste paperboard, municipal incineration | waste paperboard | Cutoff, U - RoW; treatment of waste polyethylene, municipal incineration | waste polyethylene | Cutoff, U - RoW; treatment of biowaste, municipal incineration with fly ash extraction | biowaste | Cutoff, U - CH	treatment of waste paper to pulp, wet lap, totally chlorine free bleached | deinked pulp, wet lap | Cutoff, U	500.99	485	3.2	3.7	3.3	0.1	100% milk	milk production, from cow | cow milk | Cutoff, U - RoW (adapted for Austria, see Table S1)
	2.48 g HDPE closure	polyethylene production, high density, granulate | polyethylene, high density, granulate | Cutoff, U - RER	injection moulding | injection moulding | Cutoff, U - RER	treatment of waste polyethylene, municipal incineration | waste polyethylene | Cutoff, U - RoW	n.a.
Liquid yogurt, strawberry | PET bottle	5.58 g PET bottle	polyethylene terephthalate production, granulate, bottle grade | polyethylene terephthalate, granulate, bottle grade | Cutoff, U - RER	stretch blow moulding | stretch blow moulding | Cutoff, U - RER	treatment of waste polyethylene terephthalate, municipal incineration | waste polyethylene terephthalate | Cutoff, U - RoW	n.a.	125.8	117	0.8	13	2.7	0.1	76.0% milk	milk production, from cow | cow milk | Cutoff, U - RoW (adapted for Austria, see Table S1)
	0.68 g OPS sleeve	polystyrene production, general purpose | polystyrene, general purpose | Cutoff, U - RER	extrusion, plastic film | extrusion, plastic film | Cutoff, U - RER	treatment of waste polystyrene, municipal incineration | waste polystyrene | Cutoff, U - RoW	n.a.							18.7% added water	market for tap water | tap water | Cutoff, U - Europe without Switzerland
	0.92 g HDPE closure	polyethylene production, high density, granulate | polyethylene, high density, granulate | Cutoff, U - RER	injection moulding | injection moulding | Cutoff, U - RER	treatment of waste polyethylene, municipal incineration | waste polyethylene | Cutoff, U - RoW	n.a.							3.0% sugar	market for sugar, from sugar beet | sugar, from sugar beet | Cutoff, U - GLO
												2.3% strawberry	market for strawberry | strawberry | Cutoff, U - GLO
Liquid yogurt, vanilla | PET bottle	20.22 g PET bottle	polyethylene terephthalate production, granulate, bottle grade | polyethylene terephthalate, granulate, bottle grade | Cutoff, U - RER	stretch blow moulding | stretch blow moulding | Cutoff, U - RER	treatment of waste polyethylene terephthalate, municipal incineration | waste polyethylene terephthalate | Cutoff, U - RoW	n.a.	501.13	472	0.1	13	2.7	0.1	81.0% milk	milk production, from cow | cow milk | Cutoff, U - RoW (adapted for Austria, see Table S1)
	2.09 g OPS sleeve	polystyrene production, general purpose | polystyrene, general purpose | Cutoff, U - RER	extrusion, plastic film | extrusion, plastic film | Cutoff, U - RER	treatment of waste polystyrene, municipal incineration | waste polystyrene | Cutoff, U - RoW	n.a.							11.3% added water	market for tap water | tap water | Cutoff, U - Europe without Switzerland
	2.69 g HDPE closure	polyethylene production, high density, granulate | polyethylene, high density, granulate | Cutoff, U - RER	injection moulding | injection moulding | Cutoff, U - RER	treatment of waste polyethylene, municipal incineration | waste polyethylene | Cutoff, U - RoW	n.a.							6.7% sugar	market for sugar, from sugar beet | sugar, from sugar beet | Cutoff, U - GLO
												1.0% vanilla	market for vanilla | vanilla | Cutoff, U - GLO
Cream, 23% fat | Beverage carton, flat top	8.52 g beverage carton (with flat top)	Liquid packaging board production | liquid packaging board | Cutoff, S - RER	Liquid packaging board container production | liquid packaging board container | Cutoff, U - RER Beverage carton converting | beverage carton converting | Cutoff, U	treatment of waste paperboard, municipal incineration | waste paperboard | Cutoff, U - RoW; treatment of waste polyethylene, municipal incineration | waste polyethylene | Cutoff, U - RoW; treatment of biowaste, municipal incineration with fly ash extraction | biowaste | Cutoff, U - CH	treatment of waste paper to pulp, wet lap, totally chlorine free bleached | deinked pulp, wet lap | Cutoff, U	201.37	200	23	3.7	2.5	0.08	100% milk	milk production, from cow | cow milk | Cutoff, U - RoW (adapted for Austria, see Table S1)
Cream, 36% fat | HDPE bottle	20.74 g HDPE bottle	polyethylene production, high density, granulate | polyethylene, high density, granulate | Cutoff, U - RER	blow moulding | blow moulding | Cutoff, U - RER	treatment of waste polyethylene, municipal incineration | waste polyethylene | Cutoff, U - RoW	n.a.	251.32	250	36	3.1	2	0.07	100% milk	milk production, from cow | cow milk | Cutoff, U - RoW (adapted for Austria, see Table S1)
	1.25 g OPS sleeve	polystyrene production, general purpose | polystyrene, general purpose | Cutoff, U - RER	extrusion, plastic film | extrusion, plastic film | Cutoff, U - RER	treatment of waste polystyrene, municipal incineration | waste polystyrene | Cutoff, U - RoW	n.a.
	3.01 g PP closure	polypropylene production, granulate | polypropylene, granulate | Cutoff, U	injection moulding | injection moulding | Cutoff, U - RER	treatment of waste polypropylene, municipal incineration | waste polypropylene | Cutoff, U - CH	n.a.
	0.18 g aluminum lid	market for aluminium, wrought alloy | aluminium, wrought alloy | Cutoff, U - RER	sheet rolling, aluminium |sheet rolling, aluminium | Cutoff, U	treatment of waste scrap aluminium, municipal incineration | scrap aluminium | Cutoff, U - Europe without Switzerland; treatment of waste aluminium, sanitary landfill | waste aluminium | Cutoff, U	n.a.
	0.09 g paper label	paper production, woodcontaining, lightweight coated | paper, woodcontaining, lightweight coated | Cutoff, U - RER		treatment of waste paperboard, municipal incineration | waste paperboard | Cutoff, U - RoW	n.a.
Cream, 36% fat | PS cup	7.01 g PS cup	polystyrene production, general purpose | polystyrene, general purpose | Cutoff, U	extrusion of plastic sheets and thermoforming, inline | extrusion of plastic sheets and thermoforming, inline | Cutoff, U - RoW	treatment of waste polystyrene, municipal incineration | waste polystyrene | Cutoff, U - RoW	n.a.	251.24	283*	36	3.1	2	0.07	100% milk	milk production, from cow | cow milk | Cutoff, U - RoW (adapted for Austria, see Table S1)
	0.46 g aluminum lid	market for aluminium, wrought alloy | aluminium, wrought alloy | Cutoff, U - RER	sheet rolling, aluminium |sheet rolling, aluminium | Cutoff, U	treatment of waste scrap aluminium, municipal incineration | scrap aluminium | Cutoff, U - Europe without Switzerland; treatment of waste aluminium, sanitary landfill | waste aluminium | Cutoff, U	n.a.
Low-fat cream alternative | Polymer pouch	1.78 g PE film	polyethylene production, low density, granulate | polyethylene, low density, granulate | Cutoff, U - RER	extrusion, plastic film | extrusion, plastic film | Cutoff, U - RER	treatment of waste polyethylene, municipal incineration | waste polyethylene | Cutoff, U - RoW	n.a.	204.37	200	7	5.6	1.8	0.1	60.0% added water	market for tap water | tap water | Cutoff, U - Europe without Switzerland
	1.78 g PP film	polypropylene production, granulate | polypropylene, granulate | Cutoff, U - RER	extrusion, plastic film | extrusion, plastic film | Cutoff, U - RER	treatment of waste polypropylene, municipal incineration | waste polypropylene | Cutoff, U - CH	n.a.							32.0% milk	milk production, from cow | cow milk | Cutoff, U - RoW (adapted for Austria, see Table S1)
	0.17 g EVOH film	ethylene vinyl acetate copolymer production | ethylene vinyl acetate copolymer | Cutoff, U - RER	extrusion, plastic film | extrusion, plastic film | Cutoff, U - RER	treatment of waste plastic, mixture, municipal incineration | waste plastic, mixture | Cutoff, U - RoW	n.a.							3.5% palm oil	market for palm oil, refined | palm oil, refined | Cutoff, U - GLO
	1.92 g calcium carbonate	calcium carbonate production, precipitated | calcium carbonate, precipitated | Cutoff, U - RER		treatment of limestone residue, inert material landfill | limestone residue | Cutoff, U - RoW	n.a.							3.5% rape oil	market for rape oil, crude | rape oil, crude | Cutoff, U - GLO
												0.5% sugar	market for sugar, from sugar beet | sugar, from sugar beet | Cutoff, U - GLO
												0.5% starch	market for maize starch | maize starch | Cutoff, U - GLO
Low-fat cream alternative | PET bottle	18.62 g PET bottle	polyethylene terephthalate production, granulate, bottle grade | polyethylene terephthalate, granulate, bottle grade | Cutoff, U - RER	stretch blow moulding | stretch blow moulding | Cutoff, U - RER	treatment of waste polyethylene terephthalate, municipal incineration | waste polyethylene terephthalate | Cutoff, U - RoW	n.a.	256.99	250	7	5.6	1.8	0.1	60.0% added water	market for tap water | tap water | Cutoff, U - Europe without Switzerland
	1.30 g PET sleeve	polyethylene terephthalate production, granulate, amorphous | polyethylene terephthalate, granulate, amorphous | Cutoff, U - RER	extrusion, plastic film | extrusion, plastic film | Cutoff, U - RER	treatment of waste polyethylene terephthalate, municipal incineration | waste polyethylene terephthalate | Cutoff, U - RoW	n.a.							32.0% milk	milk production, from cow | cow milk | Cutoff, U - RoW (adapted for Austria, see Table S1)
	3.14 g HDPE closure	polyethylene production, high density, granulate | polyethylene, high density, granulate | Cutoff, U - RER	injection moulding | injection moulding | Cutoff, U - RER	treatment of waste polyethylene, municipal incineration | waste polyethylene | Cutoff, U - RoW	n.a.							3.5% palm oil	market for palm oil, refined | palm oil, refined | Cutoff, U - GLO
	0.23 g aluminum lid	market for aluminium, wrought alloy | aluminium, wrought alloy | Cutoff, U - RER	sheet rolling, aluminium |sheet rolling, aluminium | Cutoff, U	treatment of waste scrap aluminium, municipal incineration | scrap aluminium | Cutoff, U - Europe without Switzerland; treatment of waste aluminium, sanitary landfill | waste aluminium | Cutoff, U	n.a.							3.5% rape oil	market for rape oil, crude | rape oil, crude | Cutoff, U - GLO
												0.5% sugar	market for sugar, from sugar beet | sugar, from sugar beet | Cutoff, U - GLO
												0.5% starch	market for maize starch | maize starch | Cutoff, U - GLO
Curd cheese, creamy | PS tub	7.48 g PS tub	polystyrene production, general purpose | polystyrene, general purpose | Cutoff, U	extrusion of plastic sheets and thermoforming, inline | extrusion of plastic sheets and thermoforming, inline | Cutoff, U - RoW	treatment of waste polystyrene, municipal incineration | waste polystyrene | Cutoff, U - RoW	n.a.	254.01	281*	4.4	3.7	11	0.1	100% milk	milk production, from cow | cow milk | Cutoff, U - RoW (adapted for Austria, see Table S1)
	0.96 g aluminum lid	market for aluminium, wrought alloy | aluminium, wrought alloy | Cutoff, U - RER	sheet rolling, aluminium |sheet rolling, aluminium | Cutoff, U	treatment of waste scrap aluminium, municipal incineration | scrap aluminium | Cutoff, U - Europe without Switzerland; treatment of waste aluminium, sanitary landfill | waste aluminium | Cutoff, U	n.a.
Curd cheese, crumbly | PS tub	7.46 g PS tub	polystyrene production, general purpose | polystyrene, general purpose | Cutoff, U	extrusion of plastic sheets and thermoforming, inline | extrusion of plastic sheets and thermoforming, inline | Cutoff, U - RoW	treatment of waste polystyrene, municipal incineration | waste polystyrene | Cutoff, U - RoW	n.a.	254.58	281*	4.4	3.7	11	0.1	100% milk	milk production, from cow | cow milk | Cutoff, U - RoW (adapted for Austria, see Table S1)
	0.93 g aluminum lid	market for aluminium, wrought alloy | aluminium, wrought alloy | Cutoff, U - RER	sheet rolling, aluminium |sheet rolling, aluminium | Cutoff, U	treatment of waste scrap aluminium, municipal incineration | scrap aluminium | Cutoff, U - Europe without Switzerland; treatment of waste aluminium, sanitary landfill | waste aluminium | Cutoff, U	n.a.
Fresh cheese, herbs | PP tub	5.95 g PP tub	polypropylene production, granulate | polypropylene, granulate | Cutoff, U - RER	extrusion of plastic sheets and thermoforming, inline | extrusion of plastic sheets and thermoforming, inline | Cutoff, U - RoW	treatment of waste polypropylene, municipal incineration | waste polypropylene | Cutoff, U - CH	n.a.	152.43	197*	23	3	6	0.95	100% milk	milk production, from cow | cow milk | Cutoff, U - RoW (adapted for Austria, see Table S1)
	2.21 g PS cap	polystyrene production, general purpose | polystyrene, general purpose | Cutoff, U	extrusion of plastic sheets and thermoforming, inline | extrusion of plastic sheets and thermoforming, inline | Cutoff, U - RoW	treatment of waste polystyrene, municipal incineration | waste polystyrene | Cutoff, U - RoW	n.a.
	0.61 g aluminum lid	market for aluminium, wrought alloy | aluminium, wrought alloy | Cutoff, U - RER	sheet rolling, aluminium |sheet rolling, aluminium | Cutoff, U	treatment of waste scrap aluminium, municipal incineration | scrap aluminium | Cutoff, U - Europe without Switzerland; treatment of waste aluminium, sanitary landfill | waste aluminium | Cutoff, U	n.a.
Fresh cheese, pepper | PP tub	8.62 g PP tub	polypropylene production, granulate | polypropylene, granulate | Cutoff, U - RER	extrusion of plastic sheets and thermoforming, inline | extrusion of plastic sheets and thermoforming, inline | Cutoff, U - RoW	treatment of waste polypropylene, municipal incineration | waste polypropylene | Cutoff, U - CH	n.a.	202.43	219*	15	4.7	10	0.9	100% milk	milk production, from cow | cow milk | Cutoff, U - RoW (adapted for Austria, see Table S1)
	3.38 g PS cap	polystyrene production, general purpose | polystyrene, general purpose | Cutoff, U	extrusion of plastic sheets and thermoforming, inline | extrusion of plastic sheets and thermoforming, inline | Cutoff, U - RoW	treatment of waste polystyrene, municipal incineration | waste polystyrene | Cutoff, U - RoW	n.a.
	0.99 g aluminum lid	market for aluminium, wrought alloy | aluminium, wrought alloy | Cutoff, U - RER	sheet rolling, aluminium |sheet rolling, aluminium | Cutoff, U	treatment of waste scrap aluminium, municipal incineration | scrap aluminium | Cutoff, U - Europe without Switzerland; treatment of waste aluminium, sanitary landfill | waste aluminium | Cutoff, U	n.a.
Fresh cheese, radish | PP tub, variant a	10.5 g PP tub	polypropylene production, granulate | polypropylene, granulate | Cutoff, U - RER	extrusion of plastic sheets and thermoforming, inline | extrusion of plastic sheets and thermoforming, inline | Cutoff, U - RoW	treatment of waste polypropylene, municipal incineration | waste polypropylene | Cutoff, U - CH	n.a.	150.89	200*	22	3.2	7.5	1	92.2% milk	milk production, from cow | cow milk | Cutoff, U - RoW (adapted for Austria, see Table S1)
	2.3 g PET cap	polyethylene terephthalate production, granulate, amorphous | polyethylene terephthalate, granulate, amorphous | Cutoff, U - RER	extrusion of plastic sheets and thermoforming, inline | extrusion of plastic sheets and thermoforming, inline | Cutoff, U - RoW	treatment of waste polyethylene terephthalate, municipal incineration | waste polyethylene terephthalate | Cutoff, U - RoW	n.a.							6.0% radish	market for radish | radish | Cutoff, U - GLO
	0.75 g aluminum lid	market for aluminium, wrought alloy | aluminium, wrought alloy | Cutoff, U - RER	sheet rolling, aluminium |sheet rolling, aluminium | Cutoff, U	treatment of waste scrap aluminium, municipal incineration | scrap aluminium | Cutoff, U - Europe without Switzerland; treatment of waste aluminium, sanitary landfill | waste aluminium | Cutoff, U	n.a.							1.8% rape oil	market for rape oil, crude | rape oil, crude | Cutoff, U - GLO
Fresh cheese, radish | PP tub, variant b	8.69 g PP tub	polypropylene production, granulate | polypropylene, granulate | Cutoff, U - RER	extrusion of plastic sheets and thermoforming, inline | extrusion of plastic sheets and thermoforming, inline | Cutoff, U - RoW	treatment of waste polypropylene, municipal incineration | waste polypropylene | Cutoff, U - CH	n.a.	198.64	216*	30	3.7	6.5	0.95	91.2% milk	milk production, from cow | cow milk | Cutoff, U - RoW (adapted for Austria, see Table S1)
	3.38 g PS cap	polystyrene production, general purpose | polystyrene, general purpose | Cutoff, U	extrusion of plastic sheets and thermoforming, inline | extrusion of plastic sheets and thermoforming, inline | Cutoff, U - RoW	treatment of waste polystyrene, municipal incineration | waste polystyrene | Cutoff, U - RoW	n.a.							8.8% radish	market for radish | radish | Cutoff, U - GLO
	1.03 g aluminum lid	market for aluminium, wrought alloy | aluminium, wrought alloy | Cutoff, U - RER	sheet rolling, aluminium |sheet rolling, aluminium | Cutoff, U	treatment of waste scrap aluminium, municipal incineration | scrap aluminium | Cutoff, U - Europe without Switzerland; treatment of waste aluminium, sanitary landfill | waste aluminium | Cutoff, U	n.a.
Fresh cheese, sweetened | PS cup	2.13 g PS cup	polystyrene production, general purpose | polystyrene, general purpose | Cutoff, U	extrusion of plastic sheets and thermoforming, inline | extrusion of plastic sheets and thermoforming, inline | Cutoff, U - RoW	treatment of waste polystyrene, municipal incineration | waste polystyrene | Cutoff, U - RoW	n.a.	49.5	55*	2.9	12.4	6.4	0.09	86.0% milk	milk production, from cow | cow milk | Cutoff, U - RoW (adapted for Austria, see Table S1)
	0.16 g aluminum lid	market for aluminium, wrought alloy | aluminium, wrought alloy | Cutoff, U - RER	sheet rolling, aluminium |sheet rolling, aluminium | Cutoff, U	treatment of waste scrap aluminium, municipal incineration | scrap aluminium | Cutoff, U - Europe without Switzerland; treatment of waste aluminium, sanitary landfill | waste aluminium | Cutoff, U	n.a.							8.0% sugar	market for sugar, from sugar beet | sugar, from sugar beet | Cutoff, U - GLO
												6.0% strawberry	market for strawberry | strawberry | Cutoff, U - GLO
Secondary and tertiary packaging
Product	g per kg dairy product (see PEFCR for dairy products, p. 114)	Raw materials	Manufacturing process	Incineration/Landfill	Recycling
Corrugated board	25.6	corrugated board box production | corrugated board box | Cutoff, U - RER		treatment of waste paperboard, municipal incineration | waste paperboard | Cutoff, U - RoW	treatment of waste paper to pulp, wet lap, totally chlorine free bleached | deinked pulp, wet lap | Cutoff, U
LDPE film	1.5	polyethylene production, low density, granulate | polyethylene, low density, granulate | Cutoff, U - RER	extrusion, plastic film | extrusion, plastic film | Cutoff, U - RER	treatment of waste polyethylene, municipal incineration | waste polyethylene | Cutoff, U - RoW	Dataset modelled with information from van Eygen et al. (2017)
Wooden pallet	6	EUR-flat pallet production | EUR-flat pallet | Cutoff, U		treatment of waste wood, untreated, municipal incineration | waste wood, untreated | Cutoff, U - RoW	n.a.
Transport of the packaging to the filling plant (besides glass)
Means of transport	Distance [km]	Ecoinvent dataset
Lorry	230	transport, freight, lorry >32 metric ton, EURO4 | transport, freight, lorry >32 metric ton, EURO4 | Cutoff, U - RER
Freight ship	360	transport, freight, inland waterways, barge | transport, freight, inland waterways, barge | Cutoff, U - RER
Freight train	280	market group for transport, freight train | transport, freight train | Cutoff, U - RER
Transport of packaging glass to the filling plant
Means of transport	Distance [km]	Ecoinvent dataset
Lorry	325	transport, freight, lorry >32 metric ton, EURO4 | transport, freight, lorry >32 metric ton, EURO4 | Cutoff, U - RER
Transport of the goods from the supermarket to the home of the consumer
Means of transport	Distance [km]	Allocation	Ecoinvent dataset
Passenger car (volume of 0.2 m³)	5	0.62	transport, passenger car, medium size, diesel, EURO 5 | transport, passenger car, medium size, diesel, EURO 5 | Cutoff, U - RER
Van	5	0.05	transport, freight, lorry 3.5-7.5 metric ton, EURO3 | transport, freight, lorry 3.5-7.5 metric ton, EURO3 | Cutoff, U - RER
on foot, public transport, bike, etc.	5	0.33	n.a.
Credits for the recycling of paper; paperfibres of beverage cartons
Substituted product	Allocation	Ecoinvent Dataset
Sulfate pulp, bleached	0.7	market for sulfate pulp, bleached | sulfate pulp, bleached | Cutoff, U - RER
Thermo-mechanical pulp	0.3	thermo-mechanical pulp production | thermo-mechanical pulp | Cutoff, U - RER
Circular Footprint Formula - Defaut values
Packaging	A	Qs_in/Qp	Qs_out/Qp
Paper, paperboard, corrugated board	0,2	0,83	0,83
Aluminium	0,2	1,00	1,00
Packaging glass	0,2	1,00	1,00
LDPE	0,5	0,61	0,61
